# Supplementary material for: Environmental DNA illuminates the dark diversity of sharks
Source: PubMed Central journal article supplement — Sci Adv. 2018 May 2;4(5):eaap9661. doi: 10.1126/sciadv.aap9661 (PMC5931749; doi:10.1126/sciadv.aap9661), 2018-05-02
Supplement: aap9661_SM.pdf [file aap9661_SM.pdf]

## Supplementary Materials for

### **Environmental DNA illuminates the dark diversity of sharks**

Germain Boussarie, Judith Bakker, Owen S. Wangensteen, Stefano Mariani, Lucas Bonnin, Jean-Baptiste Juhel, Jeremy J. Kiszka, Michel Kulbicki, Stephanie Manel, William D. Robbins, Laurent Vigliola, David Mouillot

Published 2 May 2018, *Sci. Adv.* **4**, eaap9661 (2018)  
DOI: 10.1126/sciadv.aap9661

#### **This PDF file includes:**

- fig. S1. Number of shark species per sample in overlapping collection sites.
- table S1. Full sequences of the 24 tagged primer sets used.
- table S2. Metabarcoding pipeline for COI Elasmobranchii Fields *et al.* primers.

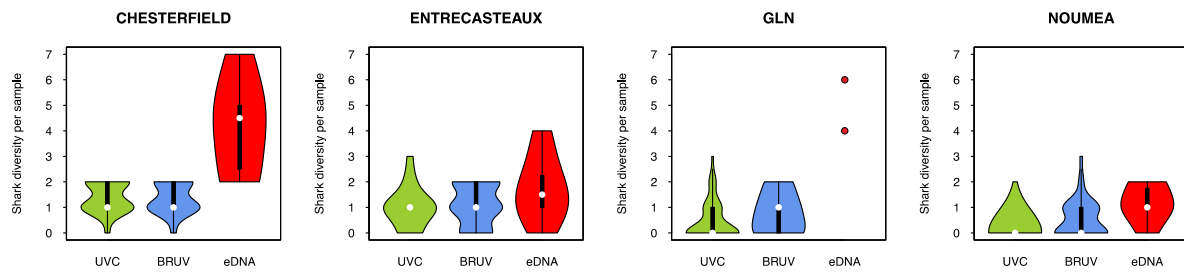

**fig. S1. Number of shark species per sample in overlapping collection sites.** Violin plot showing detected shark species richness by the different methods in Chesterfield, Entrecasteaux, GLN and Nouméa. Only two eDNA samples were collected in GLN (red dots). White dots are mean values; thick black bars correspond to interquartile ranges; thin black lines are 95% confidence intervals.

**table S1. Full sequences of the 24 tagged primer sets used.** The primer mix for each PCR included the reverse primer and an equimolar mixture of the two forward primers, all tagged with the same 8-bp tag (in lowercase in this table). A variable number of fully degenerate positions (Ns) was added at the beginning of each primer, to increase sequence diversity.

| Reverse primers       |                                   | Forward primers 1 |                                        | Forward primers 2 |                                        |
|-----------------------|-----------------------------------|-------------------|----------------------------------------|-------------------|----------------------------------------|
| Shark-COI-MINIR_tag01 | NNNNaacaagccAAGATTACAAAAGCGTGGGC  | FishF1_tag01      | NNaacaagccTCAACCAACCACAAAGACATTGGCAC   | FishF2_tag01      | NNaacaagccTCGACTAATCATAAAGATATCGGCAC   |
| Shark-COI-MINIR_tag02 | NNNggaatgagAAGATTACAAAAGCGTGGGC   | FishF1_tag02      | NNNggaatgagTCAACCAACCACAAAGACATTGGCAC  | FishF2_tag02      | NNNggaatgagTCGACTAATCATAAAGATATCGGCAC  |
| Shark-COI-MINIR_tag03 | NNNaattgccgAAGATTACAAAAGCGTGGGC   | FishF1_tag03      | NNNNaattgccgTCAACCAACCACAAAGACATTGGCAC | FishF2_tag03      | NNNNaattgccgTCGACTAATCATAAAGATATCGGCAC |
| Shark-COI-MINIR_tag04 | NNNncgaccataAAGATTACAAAAGCGTGGGC  | FishF1_tag04      | NNcgaccataTCAACCAACCACAAAGACATTGGCAC   | FishF2_tag04      | NNcgaccataTCGACTAATCATAAAGATATCGGCAC   |
| Shark-COI-MINIR_tag05 | NNNnatgetgacAAGATTACAAAAGCGTGGGC  | FishF1_tag05      | NNNnatgetgacTCAACCAACCACAAAGACATTGGCAC | FishF2_tag05      | NNNnatgetgacTCGACTAATCATAAAGATATCGGCAC |
| Shark-COI-MINIR_tag06 | NNNgagacagAAGATTACAAAAGCGTGGGC    | FishF1_tag06      | NNNngagacagTCAACCAACCACAAAGACATTGGCAC  | FishF2_tag06      | NNNngagacagTCGACTAATCATAAAGATATCGGCAC  |
| Shark-COI-MINIR_tag07 | NNNngagcttacAAGATTACAAAAGCGTGGGC  | FishF1_tag07      | NNngagcttacTCAACCAACCACAAAGACATTGGCAC  | FishF2_tag07      | NNngagcttacTCGACTAATCATAAAGATATCGGCAC  |
| Shark-COI-MINIR_tag08 | NNNttaccaggAAGATTACAAAAGCGTGGGC   | FishF1_tag08      | NNNttaccaggTCAACCAACCACAAAGACATTGGCAC  | FishF2_tag08      | NNNttaccaggTCGACTAATCATAAAGATATCGGCAC  |
| Shark-COI-MINIR_tag09 | NNNgagagctAAGATTACAAAAGCGTGGGC    | FishF1_tag09      | NNNngagagctTCAACCAACCACAAAGACATTGGCAC  | FishF2_tag09      | NNNngagagctTCGACTAATCATAAAGATATCGGCAC  |
| Shark-COI-MINIR_tag10 | NNNnctgacctAAGATTACAAAAGCGTGGGC   | FishF1_tag10      | NNnctgacctTCAACCAACCACAAAGACATTGGCAC   | FishF2_tag10      | NNnctgacctTCGACTAATCATAAAGATATCGGCAC   |
| Shark-COI-MINIR_tag11 | NNNnatgcttggAAGATTACAAAAGCGTGGGC  | FishF1_tag11      | NNNnatgcttggTCAACCAACCACAAAGACATTGGCAC | FishF2_tag11      | NNNnatgcttggTCGACTAATCATAAAGATATCGGCAC |
| Shark-COI-MINIR_tag12 | NNNaaccctgAAGATTACAAAAGCGTGGGC    | FishF1_tag12      | NNNnaaccctgTCAACCAACCACAAAGACATTGGCAC  | FishF2_tag12      | NNNnaaccctgTCGACTAATCATAAAGATATCGGCAC  |
| Shark-COI-MINIR_tag13 | NNNntaccgetAAGATTACAAAAGCGTGGGC   | FishF1_tag13      | NNntaccgetTCAACCAACCACAAAGACATTGGCAC   | FishF2_tag13      | NNntaccgetTCGACTAATCATAAAGATATCGGCAC   |
| Shark-COI-MINIR_tag14 | NNNccagtatgAAGATTACAAAAGCGTGGGC   | FishF1_tag14      | NNNccagtatgTCAACCAACCACAAAGACATTGGCAC  | FishF2_tag14      | NNNccagtatgTCGACTAATCATAAAGATATCGGCAC  |
| Shark-COI-MINIR_tag15 | NNNgagatgcAAGATTACAAAAGCGTGGGC    | FishF1_tag15      | NNNngagatgcTCAACCAACCACAAAGACATTGGCAC  | FishF2_tag15      | NNNngagatgcTCGACTAATCATAAAGATATCGGCAC  |
| Shark-COI-MINIR_tag16 | NNNngtcaactAAGATTACAAAAGCGTGGGC   | FishF1_tag16      | NNngtcaactTCAACCAACCACAAAGACATTGGCAC   | FishF2_tag16      | NNngtcaactTCGACTAATCATAAAGATATCGGCAC   |
| Shark-COI-MINIR_tag17 | NNNnacaaccgaAAGATTACAAAAGCGTGGGC  | FishF1_tag17      | NNnacaaccgaTCAACCAACCACAAAGACATTGGCAC  | FishF2_tag17      | NNnacaaccgaTCGACTAATCATAAAGATATCGGCAC  |
| Shark-COI-MINIR_tag18 | NNNngacctaAAGATTACAAAAGCGTGGGC    | FishF1_tag18      | NNNngacctaTCAACCAACCACAAAGACATTGGCAC   | FishF2_tag18      | NNNngacctaTCGACTAATCATAAAGATATCGGCAC   |
| Shark-COI-MINIR_tag19 | NNNnatggaggTAAAGATTACAAAAGCGTGGGC | FishF1_tag19      | NNnatggaggTCAACCAACCACAAAGACATTGGCAC   | FishF2_tag19      | NNnatggaggTCGACTAATCATAAAGATATCGGCAC   |
| Shark-COI-MINIR_tag20 | NNNtcatagcAAGATTACAAAAGCGTGGGC    | FishF1_tag20      | NNNtcatagcTCAACCAACCACAAAGACATTGGCAC   | FishF2_tag20      | NNNtcatagcTCGACTAATCATAAAGATATCGGCAC   |
| Shark-COI-MINIR_tag21 | NNNctgagtctAAGATTACAAAAGCGTGGGC   | FishF1_tag21      | NNNctgagtctTCAACCAACCACAAAGACATTGGCAC  | FishF2_tag21      | NNNctgagtctTCGACTAATCATAAAGATATCGGCAC  |
| Shark-COI-MINIR_tag22 | NNNngagtgaaAAGATTACAAAAGCGTGGGC   | FishF1_tag22      | NNngagtgaaTCAACCAACCACAAAGACATTGGCAC   | FishF2_tag22      | NNngagtgaaTCGACTAATCATAAAGATATCGGCAC   |
| Shark-COI-MINIR_tag23 | NNNggcatgtaAAGATTACAAAAGCGTGGGC   | FishF1_tag23      | NNNggcatgtaTCAACCAACCACAAAGACATTGGCAC  | FishF2_tag23      | NNNggcatgtaTCGACTAATCATAAAGATATCGGCAC  |
| Shark-COI-MINIR_tag24 | NNNgtgccataAAGATTACAAAAGCGTGGGC   | FishF1_tag24      | NNNgtgccataTCAACCAACCACAAAGACATTGGCAC  | FishF2_tag24      | NNNgtgccataTCGACTAATCATAAAGATATCGGCAC  |

**table S2. Metabarcoding pipeline for COI Elasmobranchii Fields *et al.* primers.**

|                                                                                                                                                                                                                                                                                                                                                                                                                                                                     |
|---------------------------------------------------------------------------------------------------------------------------------------------------------------------------------------------------------------------------------------------------------------------------------------------------------------------------------------------------------------------------------------------------------------------------------------------------------------------|
| <p><b>1. Paired-end alignment. Keep reads with quality &gt; 40. Demultiplexing.</b></p> <pre>illuminapairedend -r SHAK_S1_L001_R2_001.fastq SHAK_S1_L001_R1_001.fastq   obiannotate -S goodali:"Good_SHAK" if score&gt;40.00 else "Bad_SHAK"   obisplit -t goodali</pre> <pre>ngsfilter -t ngsfilter_SHAK_fields.tsv --fasta-output -u unidentified_SHAK.fasta Good_SHAK.fasta &gt; SHAK.filtered.fasta</pre>                                                       |
| <p><b>2. Filter sequences with lengths between 120 and 135 bp and with only 'ACGT'.</b></p> <pre>obigrep -p 'seq_length&gt;120' -p 'seq_length&lt;135' -s '^[ACGT]+\$' SHAK.filtered.fasta &gt; SHAK.filtered_length.fasta</pre>                                                                                                                                                                                                                                    |
| <p><b>3. Group unique seqs.</b></p> <pre>obiuniq -m sample SHAK.filtered_length.fasta &gt; SHAK.unique.fasta</pre>                                                                                                                                                                                                                                                                                                                                                  |
| <p><b>4. Change ids to a short index. Change format to vsearch. Remove chimeras.</b></p> <pre>obiannotate --seq-rank SHAK.unique.fasta   obiannotate --set-identifier "'SHAK'%09d" % seq_rank' &gt; SHAK.new.fasta</pre> <pre>owi_obifasta2vsearch -i SHAK.new.fasta -o SHAK.vsearch.fasta</pre> <pre>vsearch --uchime_denovo SHAK.vsearch.fasta --sizeout --nonchimeras SHAK.nonchimeras.fasta --chimeras SHAK.chimeras.fasta --uchimeout SHAK.uchimeout.txt</pre> |
| <p><b>5. Cluster at 99% with sumacust. Get cluster centers.</b></p> <pre>sumacust -t 0.99 -s count -p 10 SHAK.nonchimeras.fasta &gt; SHAK.sumacust99.fasta</pre> <pre>obigrep -p 'cluster_center' SHAK.sumacust99.fasta &gt; SHAK.sumacust99.centers.fasta</pre>                                                                                                                                                                                                    |
| <p><b>6. Taxonomic assignment using ecotag.</b></p> <pre>ecotag -d taxo_sharks -R db_Elasmobranchii_Bakker_et_al_2017.fasta SHAK.sumacust99.centers.fasta &gt; SHAK.ecotag.fasta</pre>                                                                                                                                                                                                                                                                              |
| <p><b>7. Add taxa above order level.</b></p> <pre>owi_add_taxonomy -i SHAK.ecotag.fasta -o SHAK.ecotag.fasta.annotated.csv</pre>                                                                                                                                                                                                                                                                                                                                    |
| <p><b>8. Recount abundances by sample.</b></p> <pre>obitab -o SHAK.sumacust99.fasta &gt; SHAK.sumacust99.tab</pre> <pre>owi_recount_sumacust -i SHAK.sumacust99.tab -o SHAK.sumacust99.counts.csv</pre>                                                                                                                                                                                                                                                             |
| <p><b>9. Combine ecotag and abundance files.</b></p> <pre>owi_combine -i SHAK.ecotag.fasta.annotated.csv -a SHAK.sumacust99.counts.csv -o SHAK_all_MOTUs.csv</pre>                                                                                                                                                                                                                                                                                                  |
| <p><b>10. Collapse MOTUs.</b></p> <pre>owi_collapse -s 13 -e 88 -i SHAK_all_MOTUs.csv</pre>                                                                                                                                                                                                                                                                                                                                                                         |
| <p><b>11. Curate the dataset manually.</b></p>                                                                                                                                                                                                                                                                                                                                                                                                                      |
| <p><b>12. Re-collapse MOTUs after curating.</b></p> <pre>owi_collapse -s 13 -e 88 -i SHAK_all_MOTUs_curated.csv</pre>                                                                                                                                                                                                                                                                                                                                               |
